# Supplementary material for: Evaluating Professionalism and Design of Dental Practice Websites
Source: Research Square preprint supplement (doi:10.21203/rs.3.rs-2374498/v1), 2022-12-16
Supplement: Supplementary file 1 [file f67d9a06bd7b5a29b321d8b3.docx]

Table 1. Results of 11 Ps evaluation checklist

|  | Yes  N(%) | No  N(%) |
| --- | --- | --- |
| **Section 1 – Products (services)** | | |
| 1. Do they provide a list of services available? | 98(94) | 6(5.8) |
| 1. Do they provide a list of products offered at the practice? | 25(24) | 79(76) |
| **Section 2 – Price** | | |
| 1. Is there general information about fees? | 88(84.6) | 16(15.4) |
| 1. Is there a clear price list for services available? | 75(72) | 29(28) |
| 1. Is there a clear price list for products available? | 31(29.8) | 73(70.2) |
| **Section 3 – Promotion** | | |
| 1. Are there any photos of the practice? | 64(61.5) | 40(38.5) |
| 1. Are there any photos of the products? | 7(6.7) | 97(93.3) |
| 1. Are there any photos of patient cases? | 34(32.7) | 70(67.3) |
| 1. Is there introductory information about the practice? | 92(88.5) | 12(11.5) |
| 1. Is there general information about dentists’ expertise? | 82(79) | 22(21) |
| 1. Is there information about the dentists' affiliations? | 71(68.3) | 33(31.7) |
| 1. Do any of the following appear in the practice’s digital media: mission statement or mission philosophy? | 63(60.6) | 41(39.4) |
| 1. Do they offer languages other than English at the practice? | 28(27) | 76(73) |
| 1. Are there provisions for disabled patients? | 14(13.5) | 90(86.5) |
| 1. Are there patient testimonials? | 70(67.3) | 34(32.7) |
| 1. Does the clinic show any social media activity to other professional networks? | 7(6.7) | 97(93.3) |
| 1. Are price offers available? | 32(31) | 72(69) |
| 1. Are promotional products available online? | 7(6.7) | 97(93.3) |
| 1. Asks patients to rate/like/follow? | 9(8.7) | 95(91.3) |
| **Section 4 - Place** | | |
| 1. Are the practice opening times stated? | 97(93.3) | 7(6.7) |
| 1. Are there directions on how to get to the practice? | 79(76) | 25(24) |
| 1. Is a digital map of the clinic provided? | 86(82.7) | 18(17.3) |
| 1. Is there information about parking? | 29(28) | 75(72) |
| 1. Is there information about disabled access? | 21(20.2) | 83(79.8) |
| 1. Is there information about emergency appointments? | 77(74) | 27(26) |
| **Section 5 – People (Patients and Professionals)** | | |
| 1. Does any member of the dental team present any of their personal social media in the practice website? | 2(2) | 102(98) |
| 1. Is there an on-line enquiry form? | 76(73) | 28(27) |
| **Section 6 -** **Physical design (Accessibility of design, navigability)** | | |
| 1. Is the design of the digital media easy to navigate? | 98(94.2) | 6(5.8) |
| 1. Is there branding of the clinic? i.e., logo and colour scheme | 100(96.2) | 4(3.8) |
| 1. Is there a frequently asked questions section? | 21(20.2) | 83(79.8) |
| 1. Is there downloadable information available to patients? | 23(22) | 81(78) |
| 1. Does the colour scheme provide clear readability? This is regarding accessible design | 96(92.3) | 8(7.7) |
| **Section 7 -** **Process (Procedures on specific digital media use and ecommerce)** | | |
| 1. Is there information specifically for new patients for booking appointments online? | 46(44.2) | 58(55.8) |
| 1. Is there information on secured payment methods? | 30(28.8) | 74(71.2) |
| 1. Is there information on how to make a complaint online? | 44(42.3) | 60(57.7) |
| 1. Do they state who to contact if they are not happy with their complaint’s response? | 28(27) | 76(73) |
| **Section 8 – Presence** | | |
| 1. Does the dental practice have a social media page? | 79(76) | 25(24) |
| 1. Does the dental practice have Facebook? | 75(72) | 29(28) |
| 1. Does the dental practice have Instagram? | 34(32.7) | 70(67.3) |
| 1. Does the dental practice have Twitter? | 42(40.4) | 62(59.6) |
| 1. Does the dental practice have LinkedIn | 24(23) | 80(78) |
| 1. Do the dentists have a personal work profile? | 67(64.4) | 37(35.6) |
| 1. Are there any social media posts that may be considered unprofessional? | 1(1) | 103(99) |
| **Section 9 - Profile Information of the Practice and the Dental Team** | | |
| 1. Is the name of the practice stated? | 104(100) | 0(0) |
| 1. Is the practice email address stated? | 91(87.5) | 13(12.5) |
| 1. Is the practice telephone number stated? | 104(100) | 0(0) |
| 1. Are the dentists' names available? | 100(97) | 4(4) |
| 1. Do the dentists' educational qualifications appear? | 88(84.6) | 16(15.4) |
| 1. Do the dentists' GDC registration numbers appear? | 81(78) | 23(22) |
| 1. Are there photos of dentists/staff? | 59(56.7) | 45(43.3) |
| 1. Any information that reveals private or personal information to the public? | 3(3) | 101(97) |
| 1. Do the dentists state the country in which the qualifications were attained? | 61(58.7) | 43(41.3) |
| **Section 10 - Policies and Guidance** | | |
| 1. Do they claim that a practitioner is a specialist? | 48(46) | 56(54) |
| 1. If so, are they on the specialist register? | 45(94) | 59(6) |
| 1. Do they have NHS contract? | 64(61.5) | 40(38.5) |
| 1. Does the practice state whether the treatment is private? | 72(69) | 32(31) |
| 1. Are sources cited for patient information on the website? | 13(12.5) | 91(87.5) |
| 1. Do they provide a link to the GDC website? | 19(18.3) | 85(81.7) |
| 1. Is the GDC address and contact details available? | 13(12.5) | 91(87.5) |
| 1. Is there reference to the fact that the dentist adheres to the rules governing the profession? | 21(20) | 83(80) |
| 1. Is it clear who to contact for issues on any information within the digital media of the practice? | 16(15.4) | 88(84.6) |
| 1. Do they state the last date website was updated? | 27(26) | 77(74) |
| **Section 11** **- Patient Data Protection and Privacy** | | |
| 1. Is there any information you found that may indicate that patient confidentiality may be breached? | 21(20.2) | 83(79.8) |
| 1. Are before and after photos of patients’ treatment provided? | 30(28.8) | 74(71.2) |
| 1. Are there any type of consent forms to sign? | 5(4.8) | 99(95.2) |
| 1. Any information about data protection? | 34(32.7) | 70(67.3) |
| 1. Any information about code of practice? | 32(30.8) | 72(69.2) |
| 1. Any information about privacy policy? | 68(65.4) | 36(34.6) |
| 1. Any information about cookie policy? | 47(45.2) | 57(54.8) |
